# Supplementary material
Source: Research Square preprint supplement (doi:10.21203/rs.3.rs-9386337/v1)
Supplement: Supplementary file 1 [file 4e1a5079f49381be656a551d.docx]

**Tailoring Porous Silicon Micro-nanostructures via Alloy Precursor Engineering for High‑Performance Lithium‑Ion Battery Anodes**

Liang Liu1, Jialin Zhang1, Chunlong Li1, Zhenchao Xu1, Qidi Wang1, Limei Wang1*, Yun Wang2

1. Automotive Engineering Research Institute, Jiangsu University, Zhenjiang 212013, China
2. Jiangsu Autoparts New Energy Technology Co., Ltd, Zhenjiang 212132, China

*Corresponding author: [wanglimei@ujs.edu.cn](mailto:lliu@ujs.edu.cn)

**Table. S1** Measurement results of the crystalline size of Si of PSi particles.

| Sample | Crystalline size of Si (nm) |
| --- | --- |
| PSi12 | 16 nm |
| PSi20 | 28 nm |
| PSi30 | 30 nm |
| PSi40 | 48 nm |
| PSi50 | >100 nm |


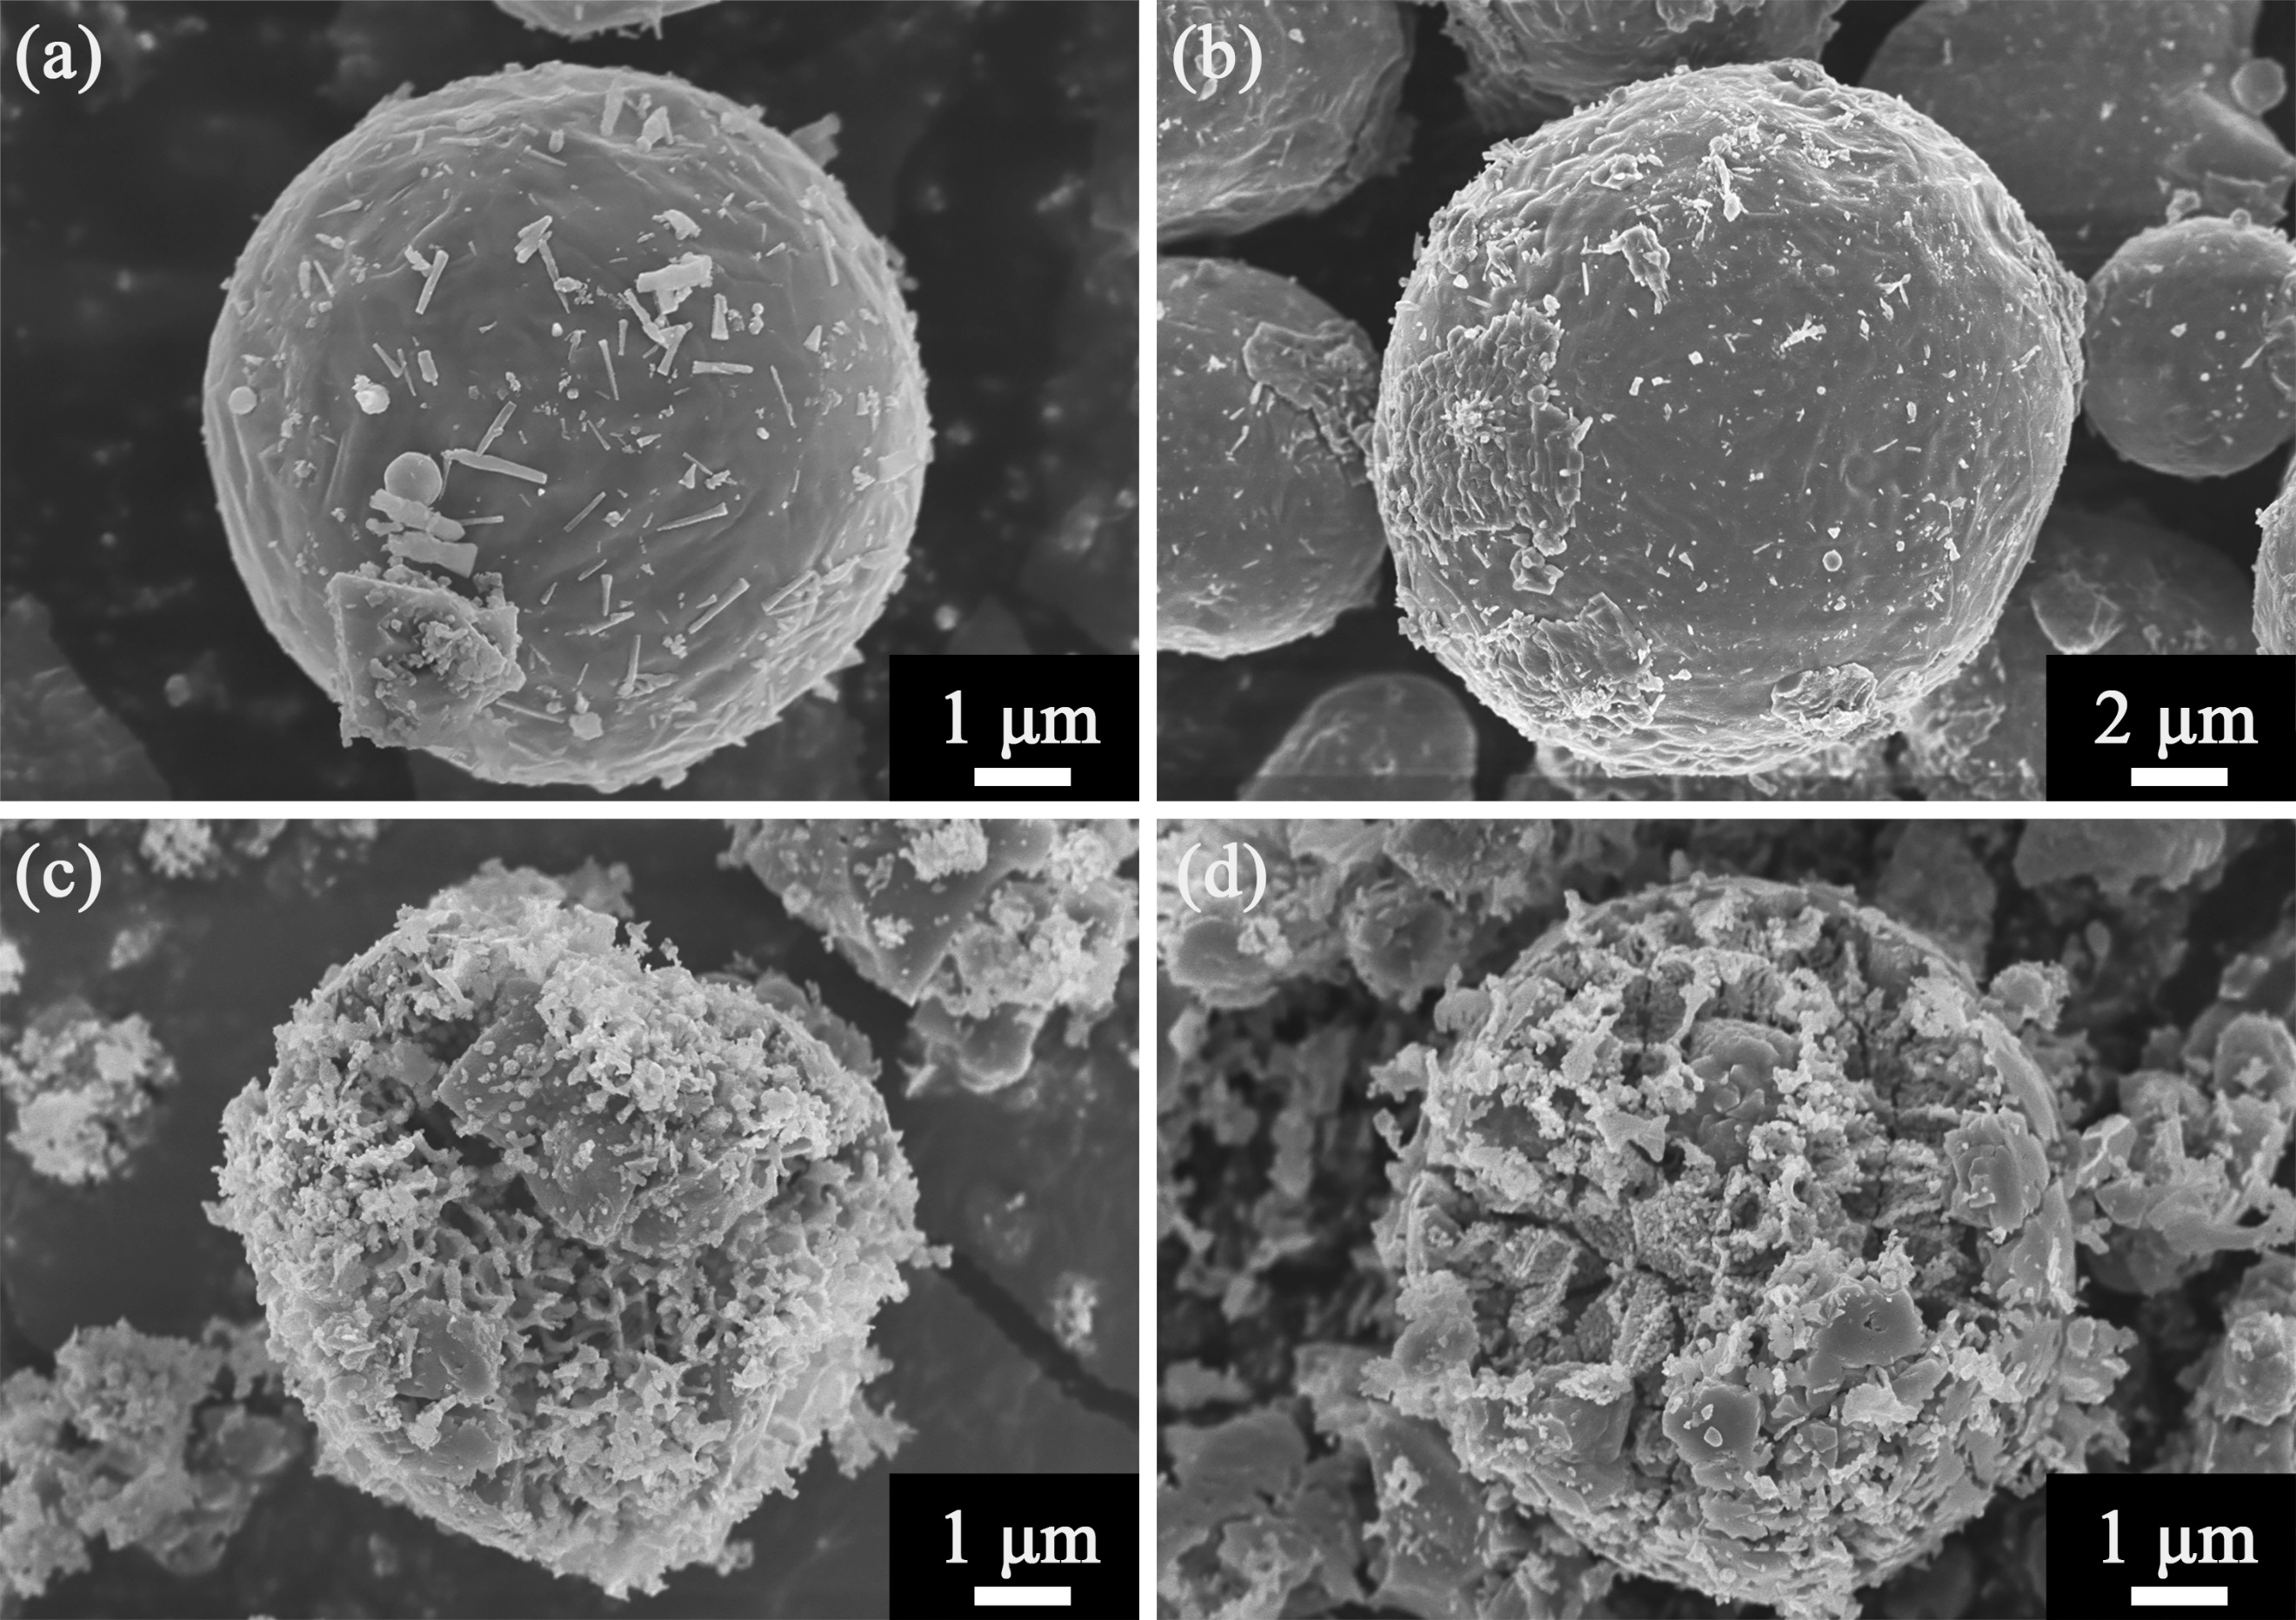


**Fig. S1** SEM images of porous silicon samples before etching (a, b) and after etching (c, d): PSi30 (a, c) and PSi40 (b, d).


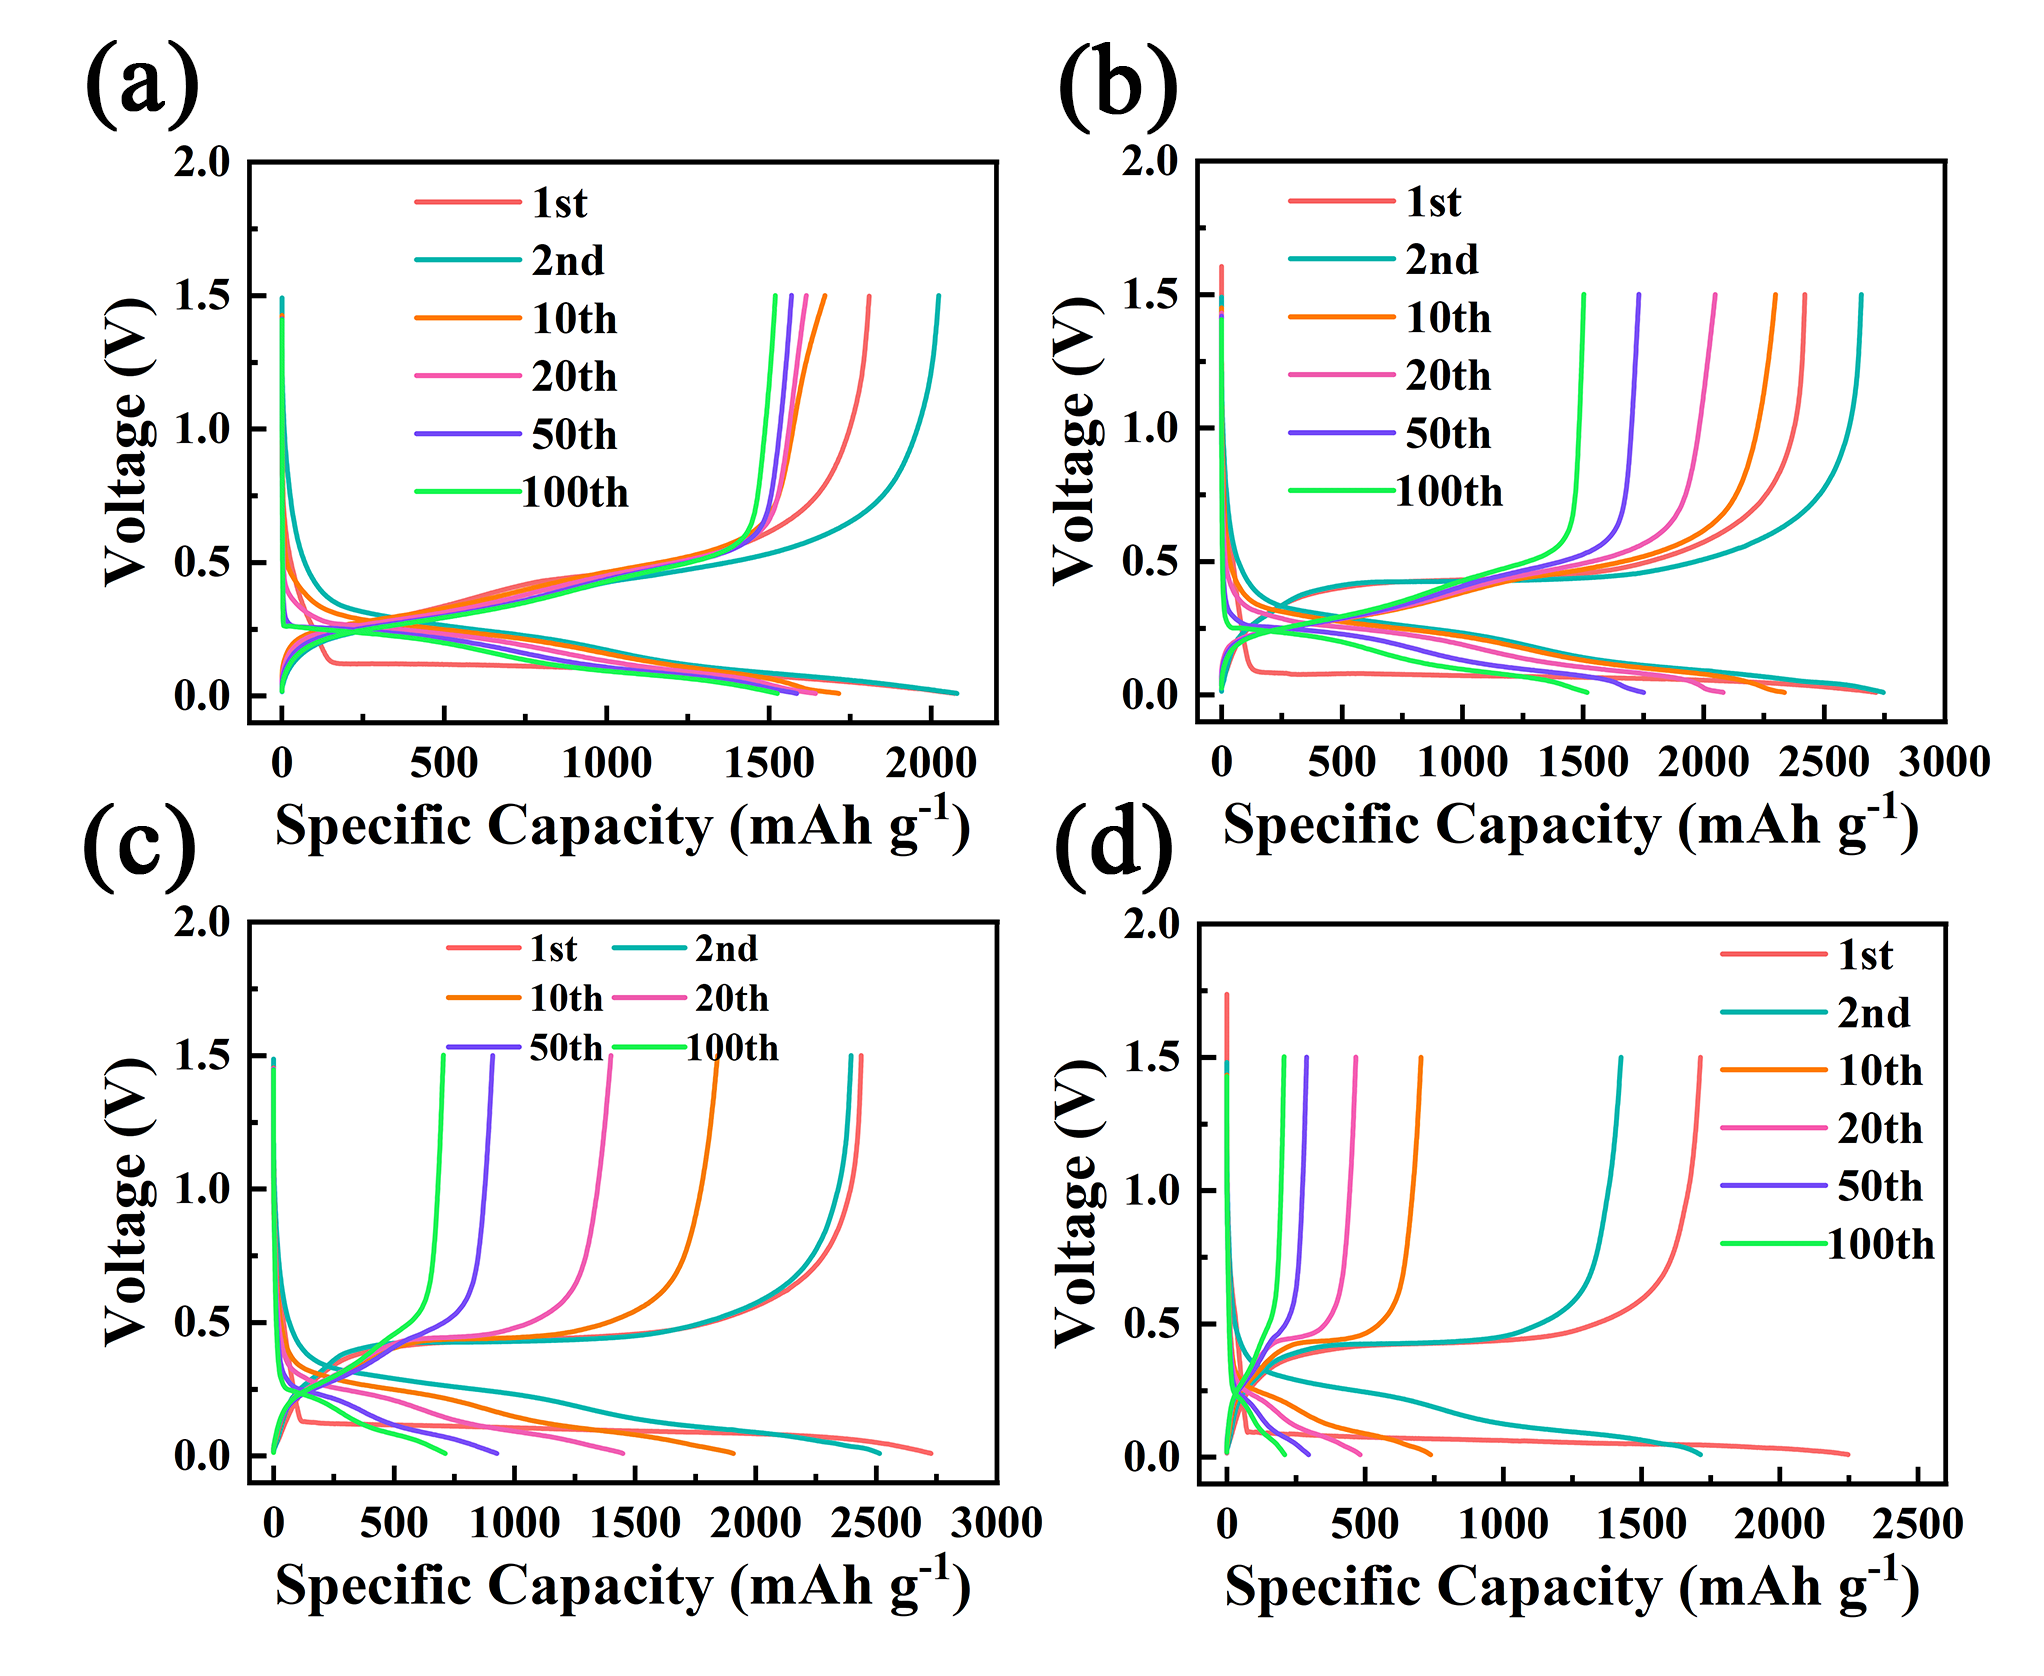


**Fig. S2** Galvanostatic charge-discharge voltage profiles at 500 mA g-1 for the 1st, 2nd, 10th, 20th, 50th, and 100th cycles: (a) PSi12, (b) PSi30, (c) PSi40, and (d) PSi50.


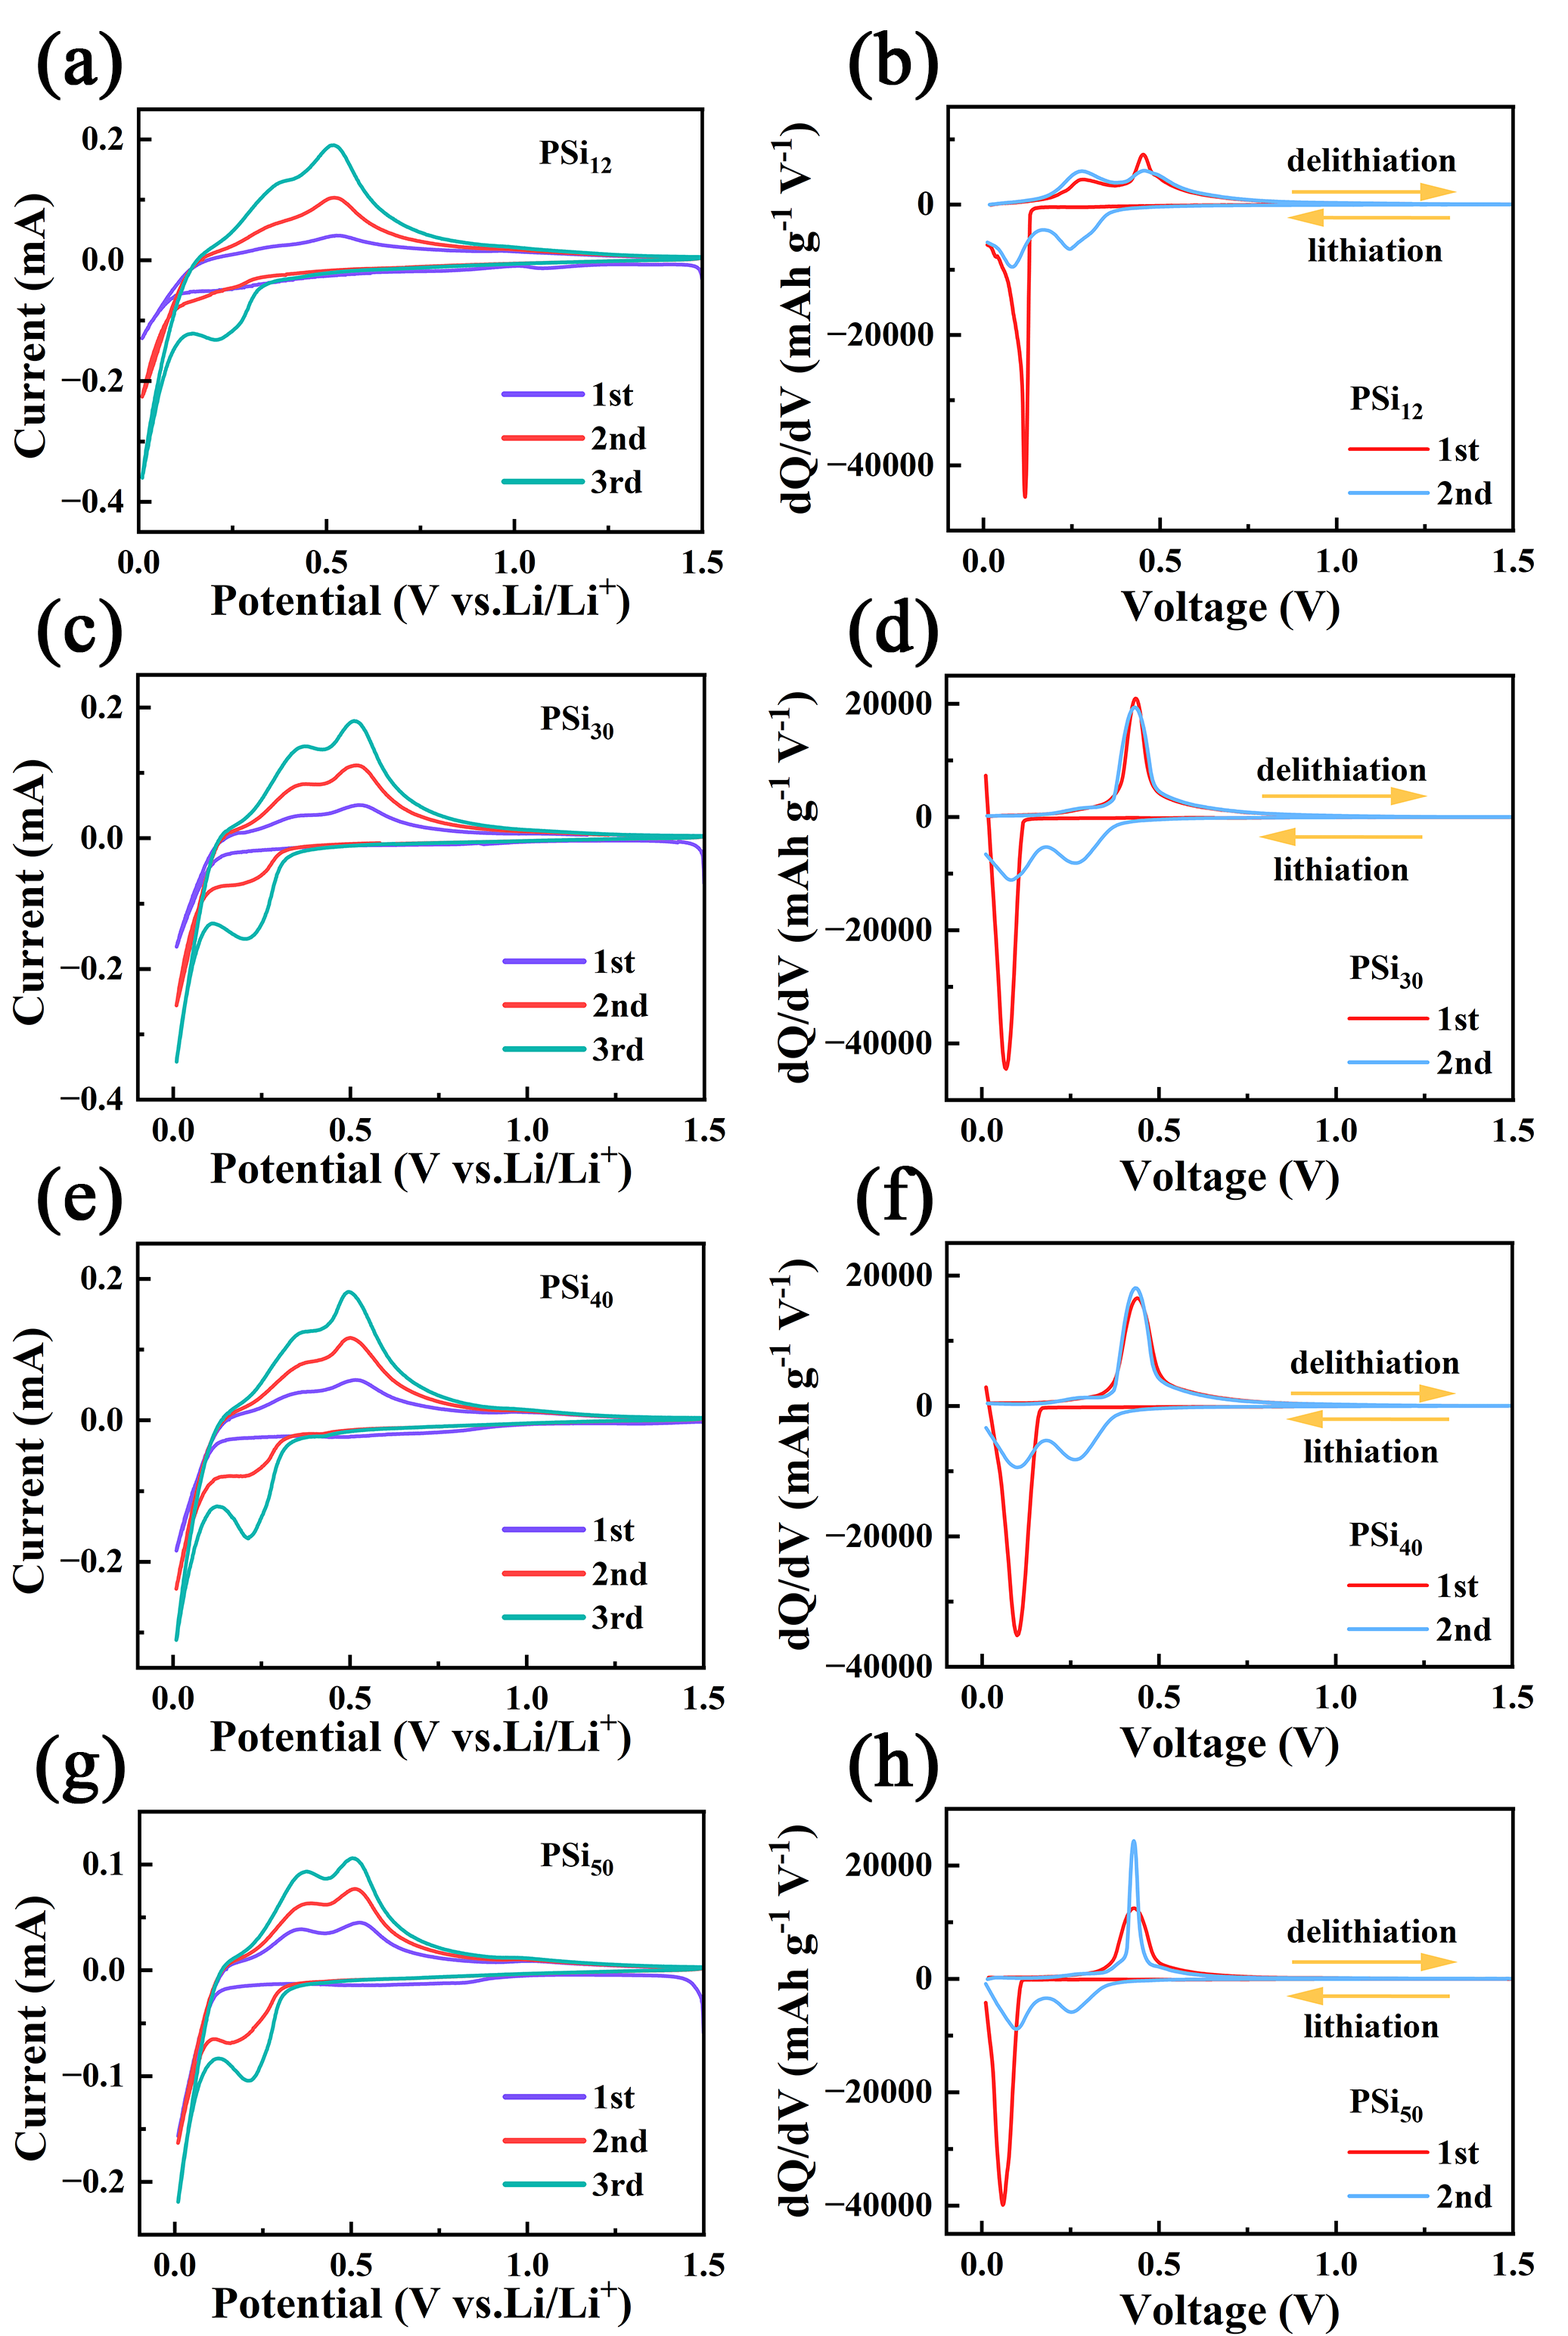


**Fig. S3** Cyclic voltammetry (CV) curves for the first three cycles at 0.1 mV s-1 between 0.01 and 1.5 V (a, c, e, g) and dQ/dV curves for the first two cycles (b, d, f, h): PSi12 (a, b), PSi30 (c, d), PSi40 (e, f), and PSi50 (g, h).


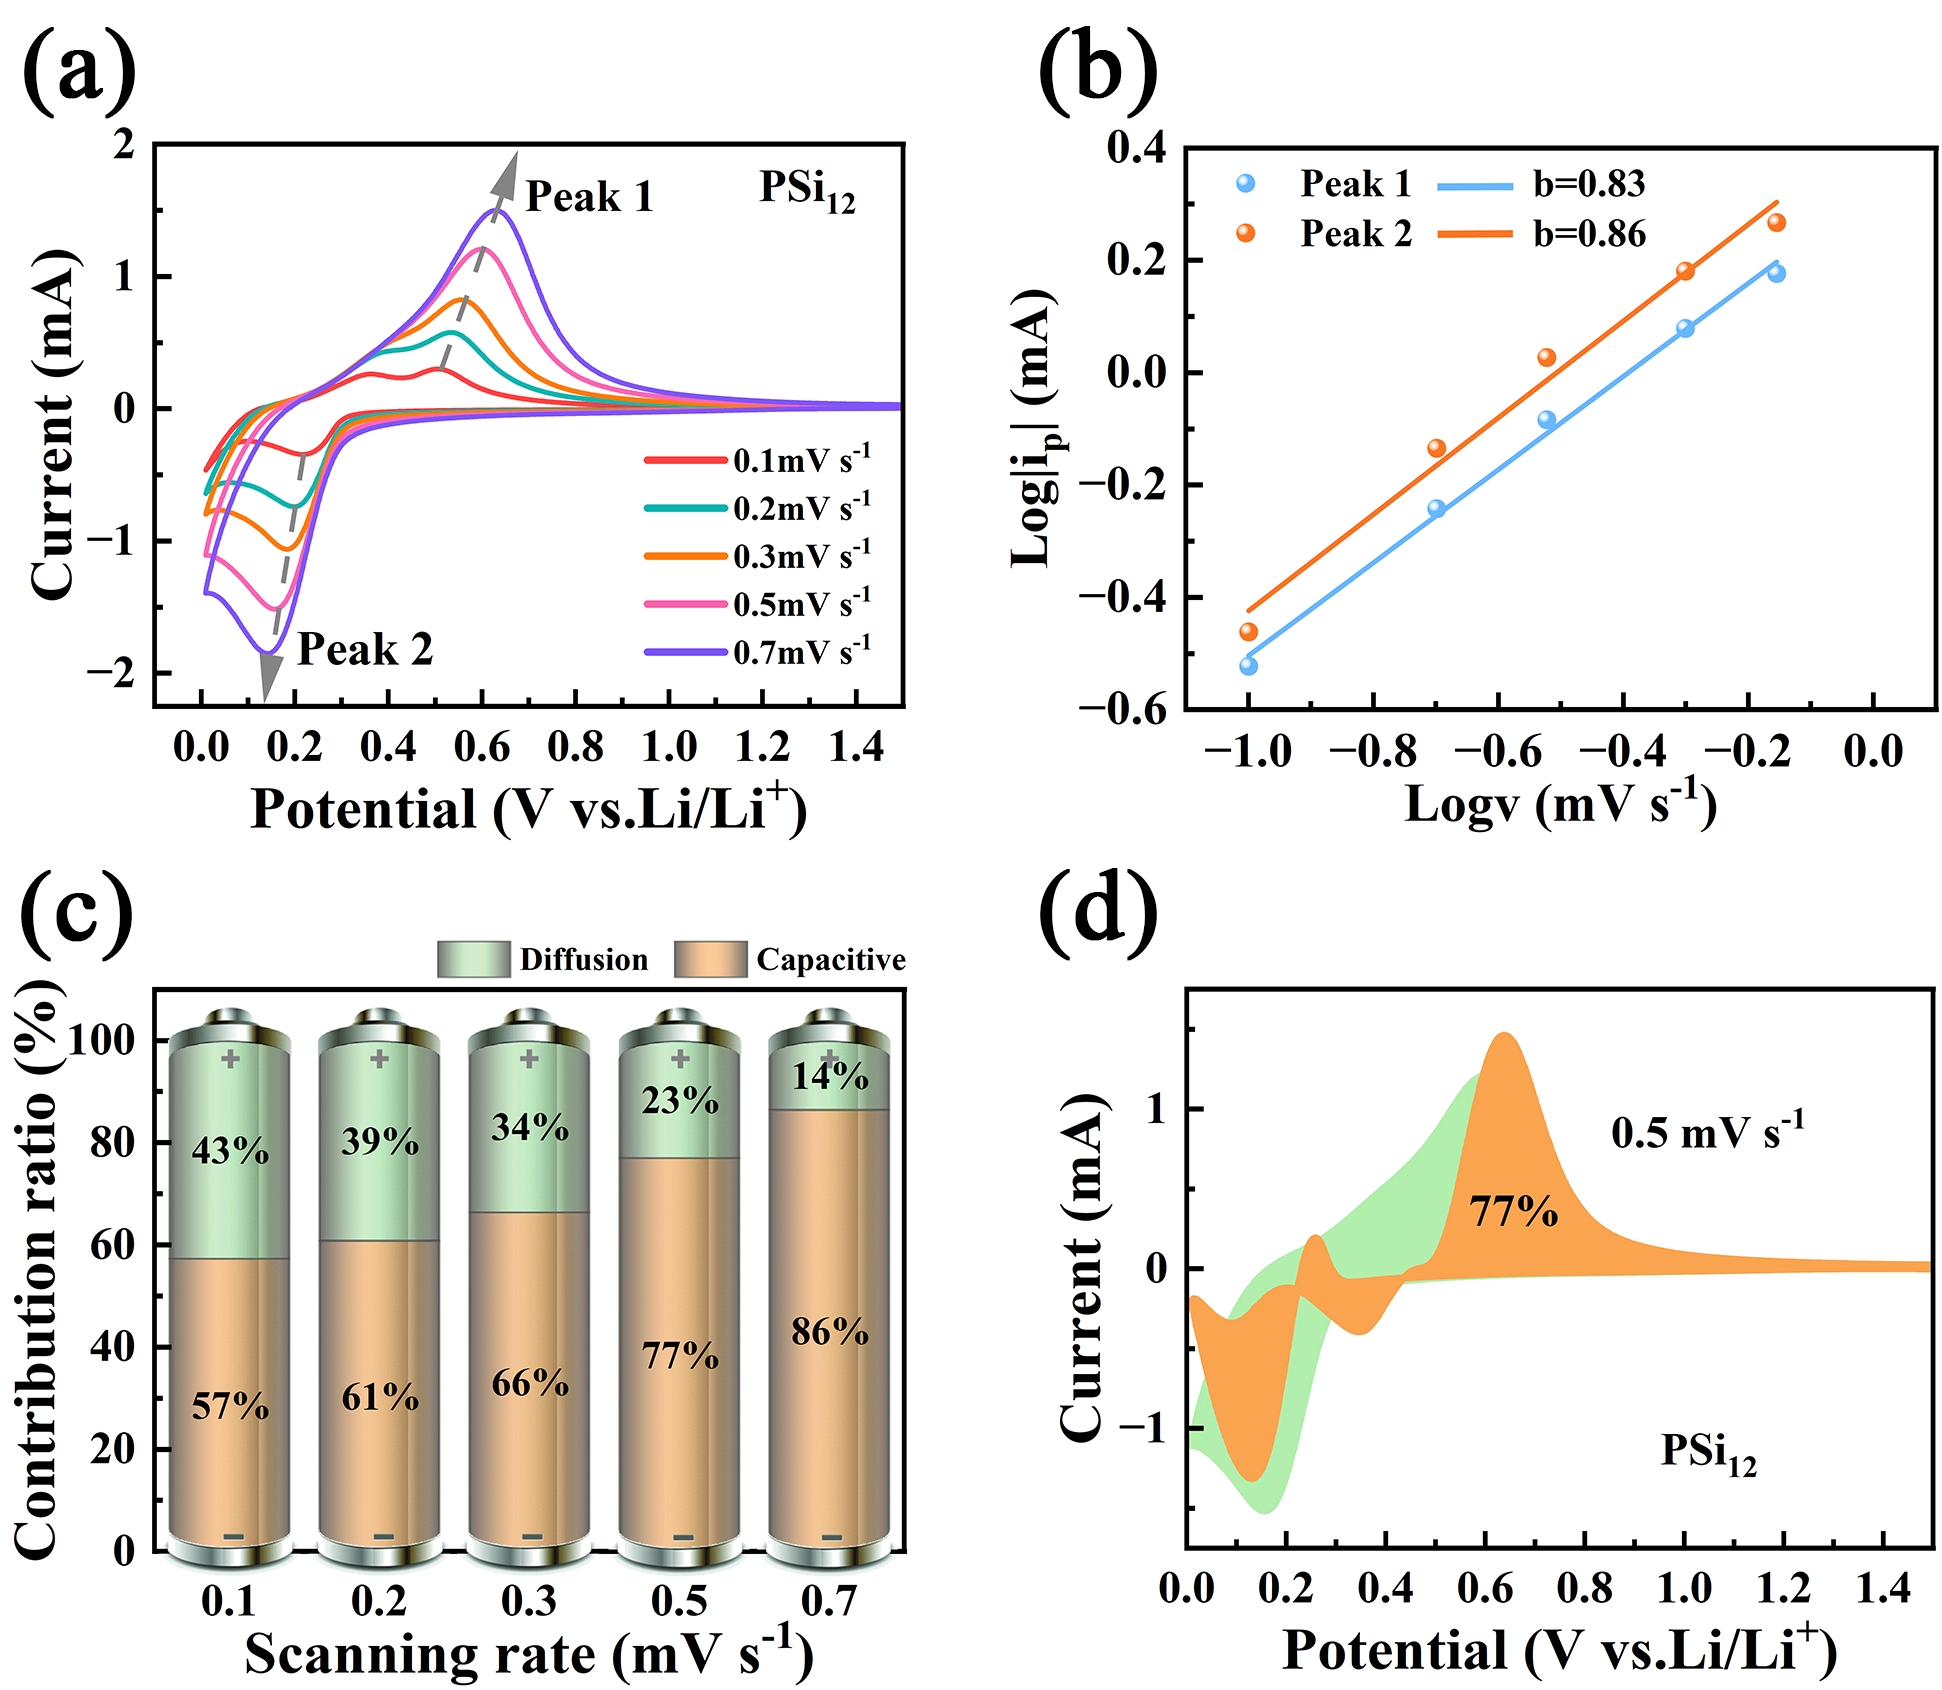


**Fig. S4** (a) CV curves at scan rates of 0.1, 0.2, 0.3, 0.5 and 0.7 mV s-1, (b) against at marked peaks, (c) the percentages of pseudocapacitive contribution at different scan rates and (d) the detailed pseudocapacitive contribution at 0.5 mV s-1 of PSi12.


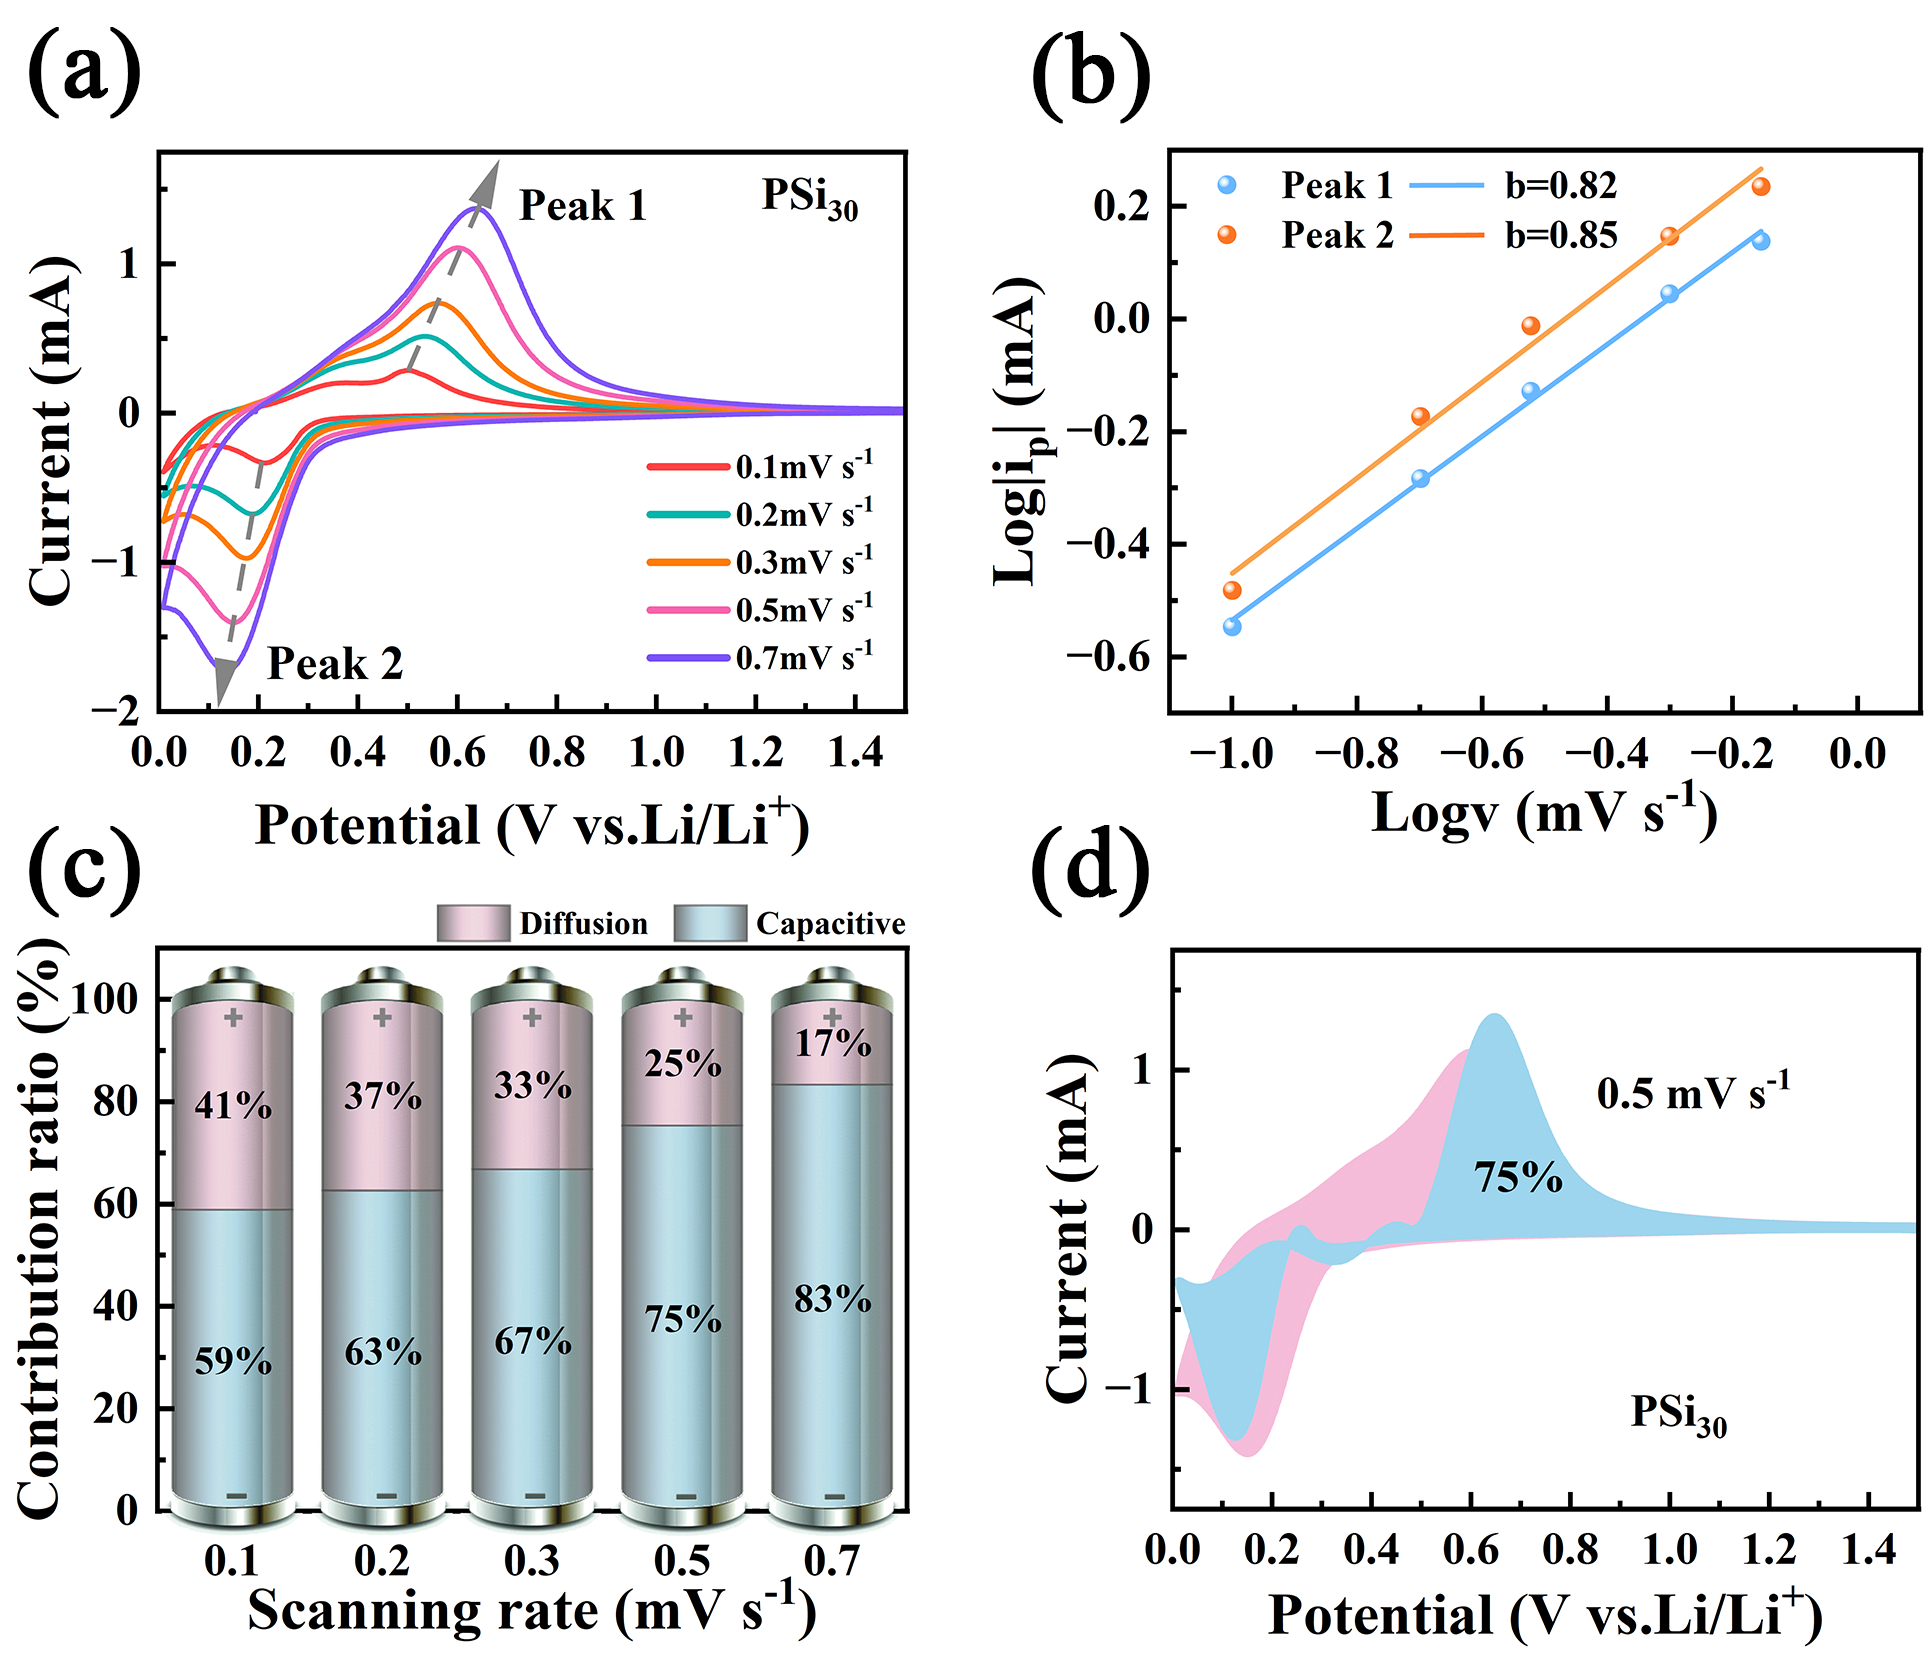


**Fig. S5** (a) CV curves at scan rates of 0.1, 0.2, 0.3, 0.5 and 0.7 mV s-1, (b) against at marked peaks, (c) the percentages of pseudocapacitive contribution at different scan rates and (d) the detailed pseudocapacitive contribution at 0.5 mV s-1 of PSi30.

**
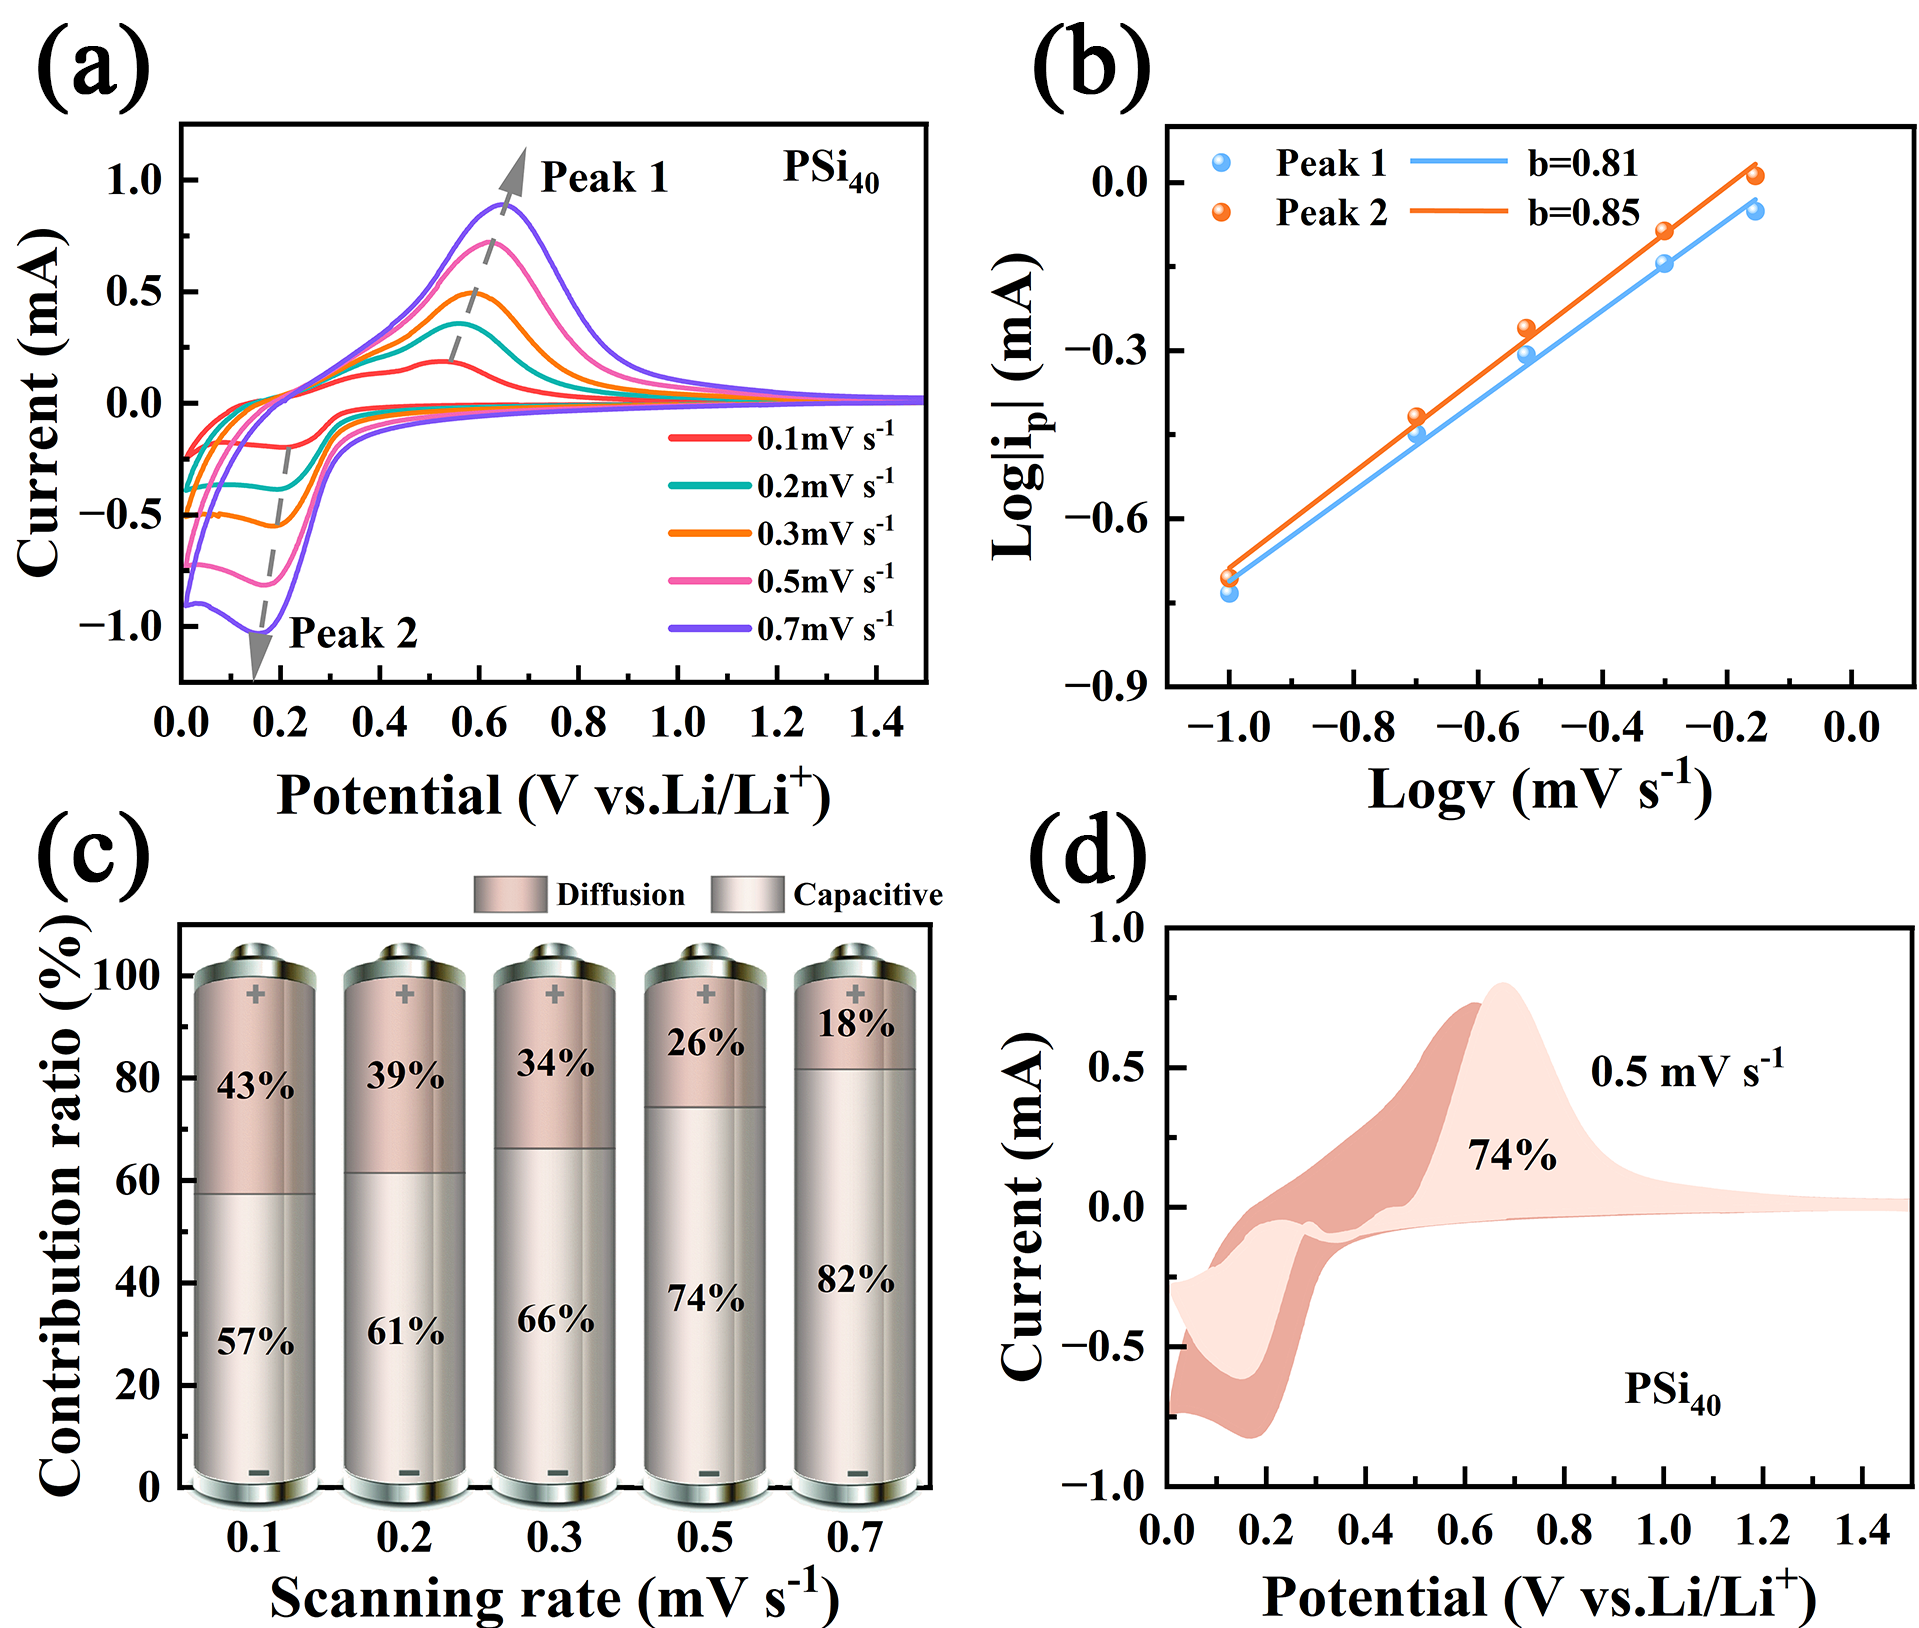
**

**Fig. S6** (a) CV curves at scan rates of 0.1, 0.2, 0.3, 0.5 and 0.7 mV s-1, (b) against at marked peaks, (c) the percentages of pseudocapacitive contribution at different scan rates and (d) the detailed pseudocapacitive contribution at 0.5 mV s-1 of PSi40.


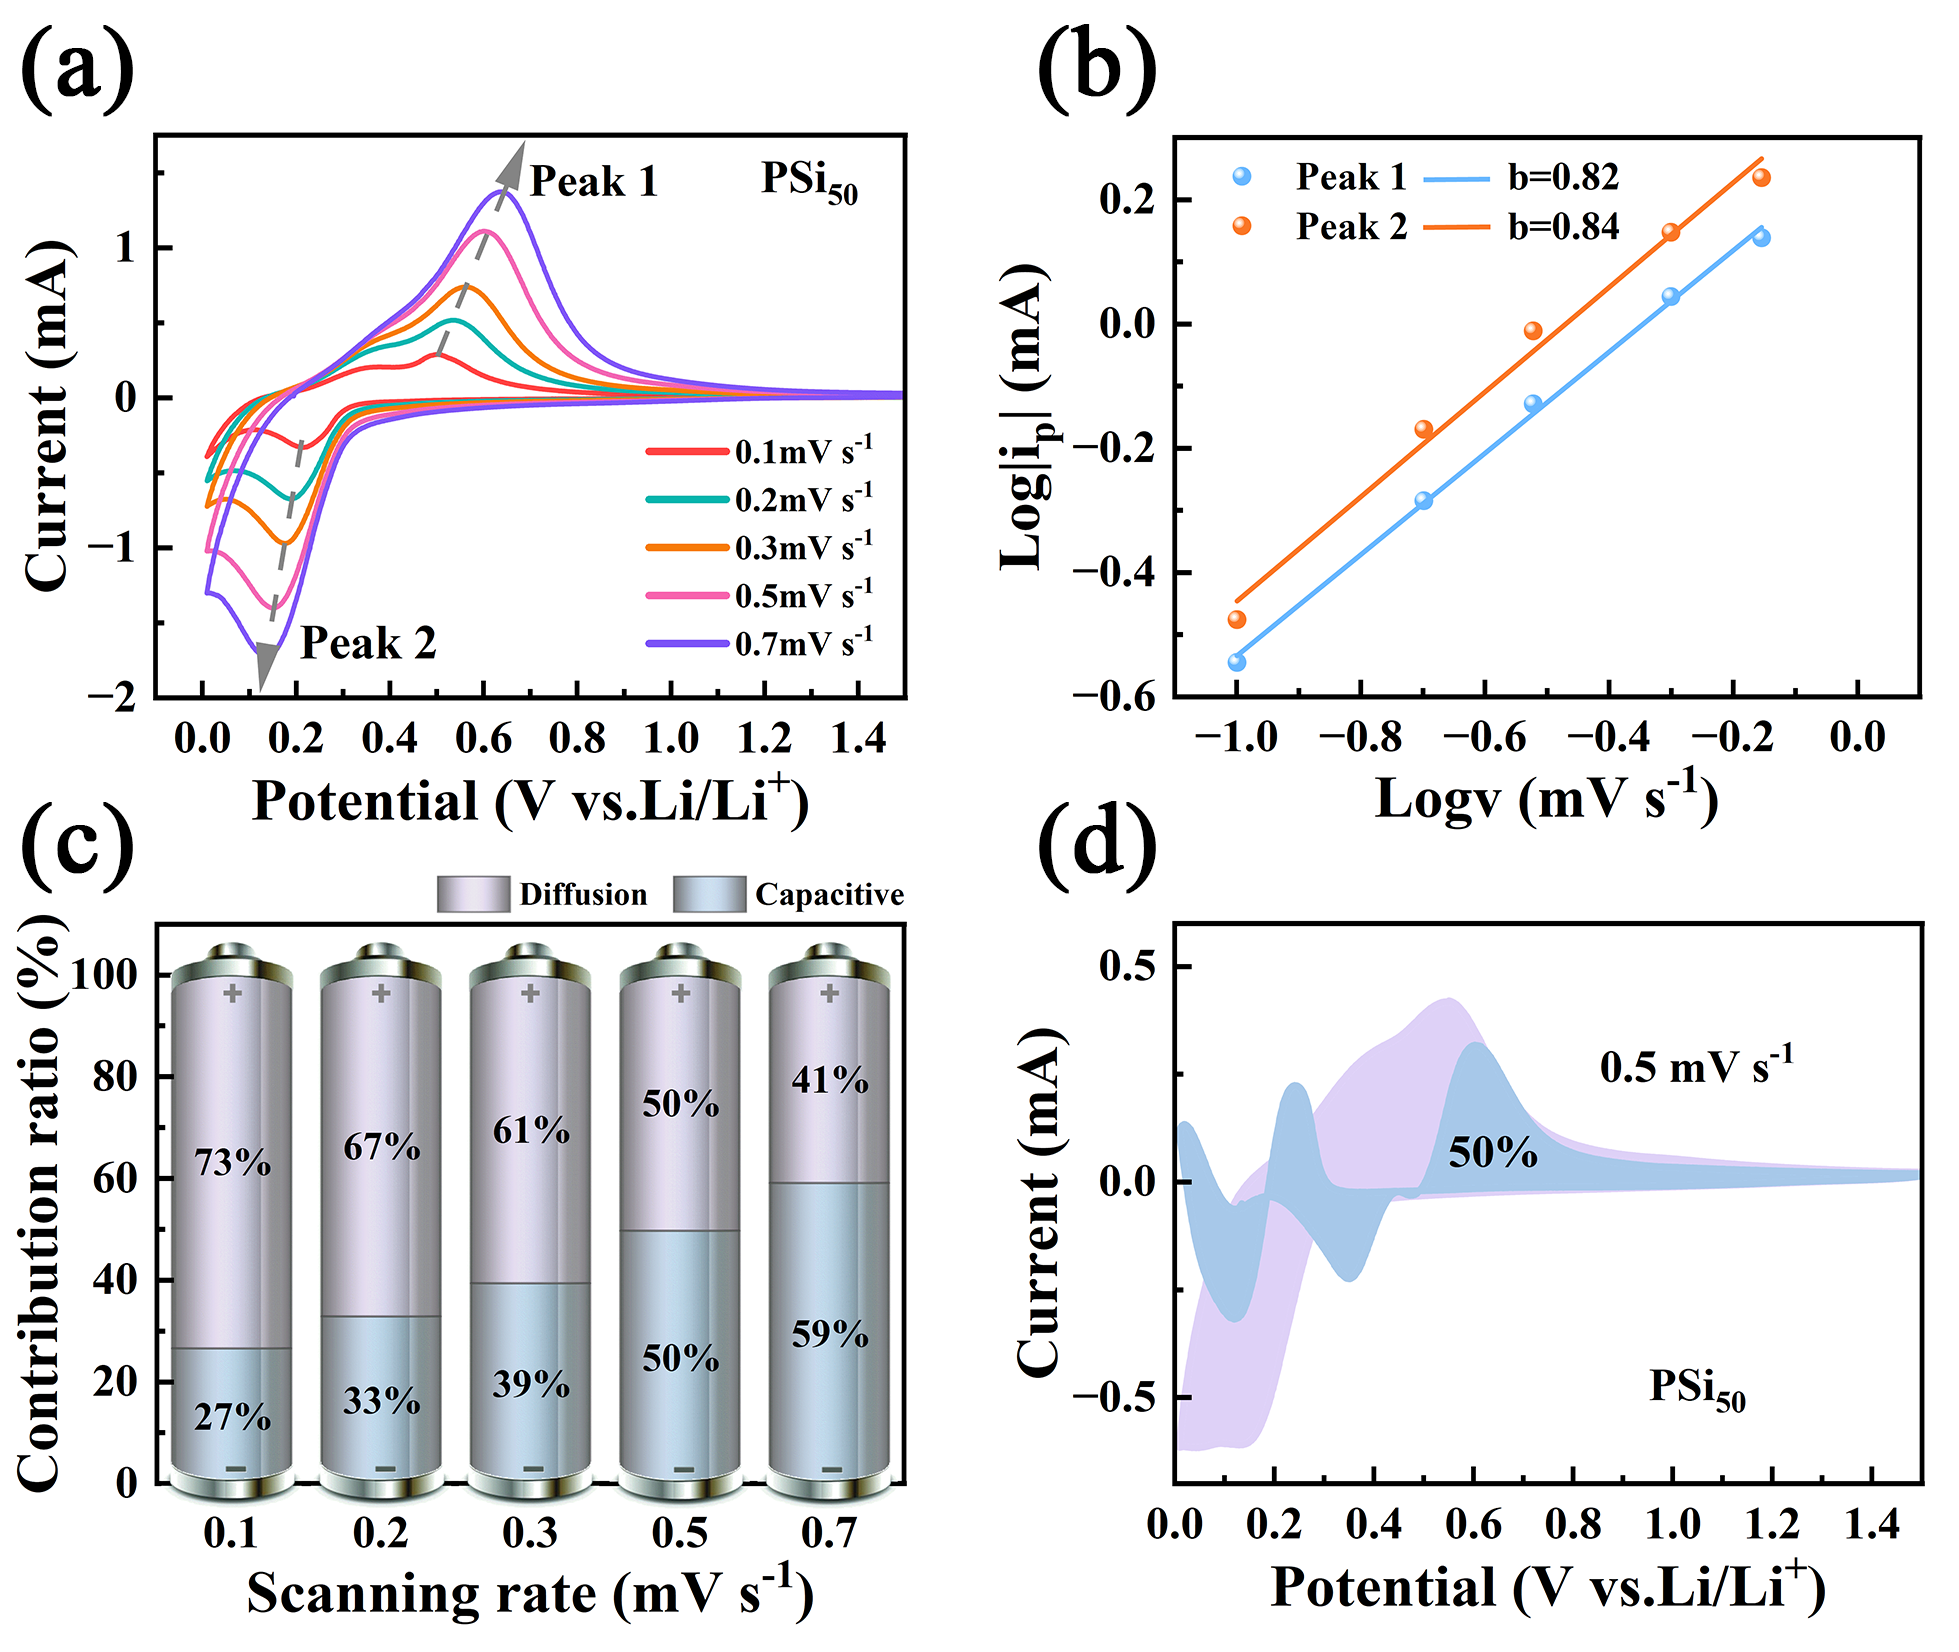


**Fig. S7** (a) CV curves at scan rates of 0.1, 0.2, 0.3, 0.5 and 0.7 mV s-1, (b) against at marked peaks, (c) the percentages of pseudocapacitive contribution at different scan rates and (d) the detailed pseudocapacitive contribution at 0.5 mV s-1 of PSi50.


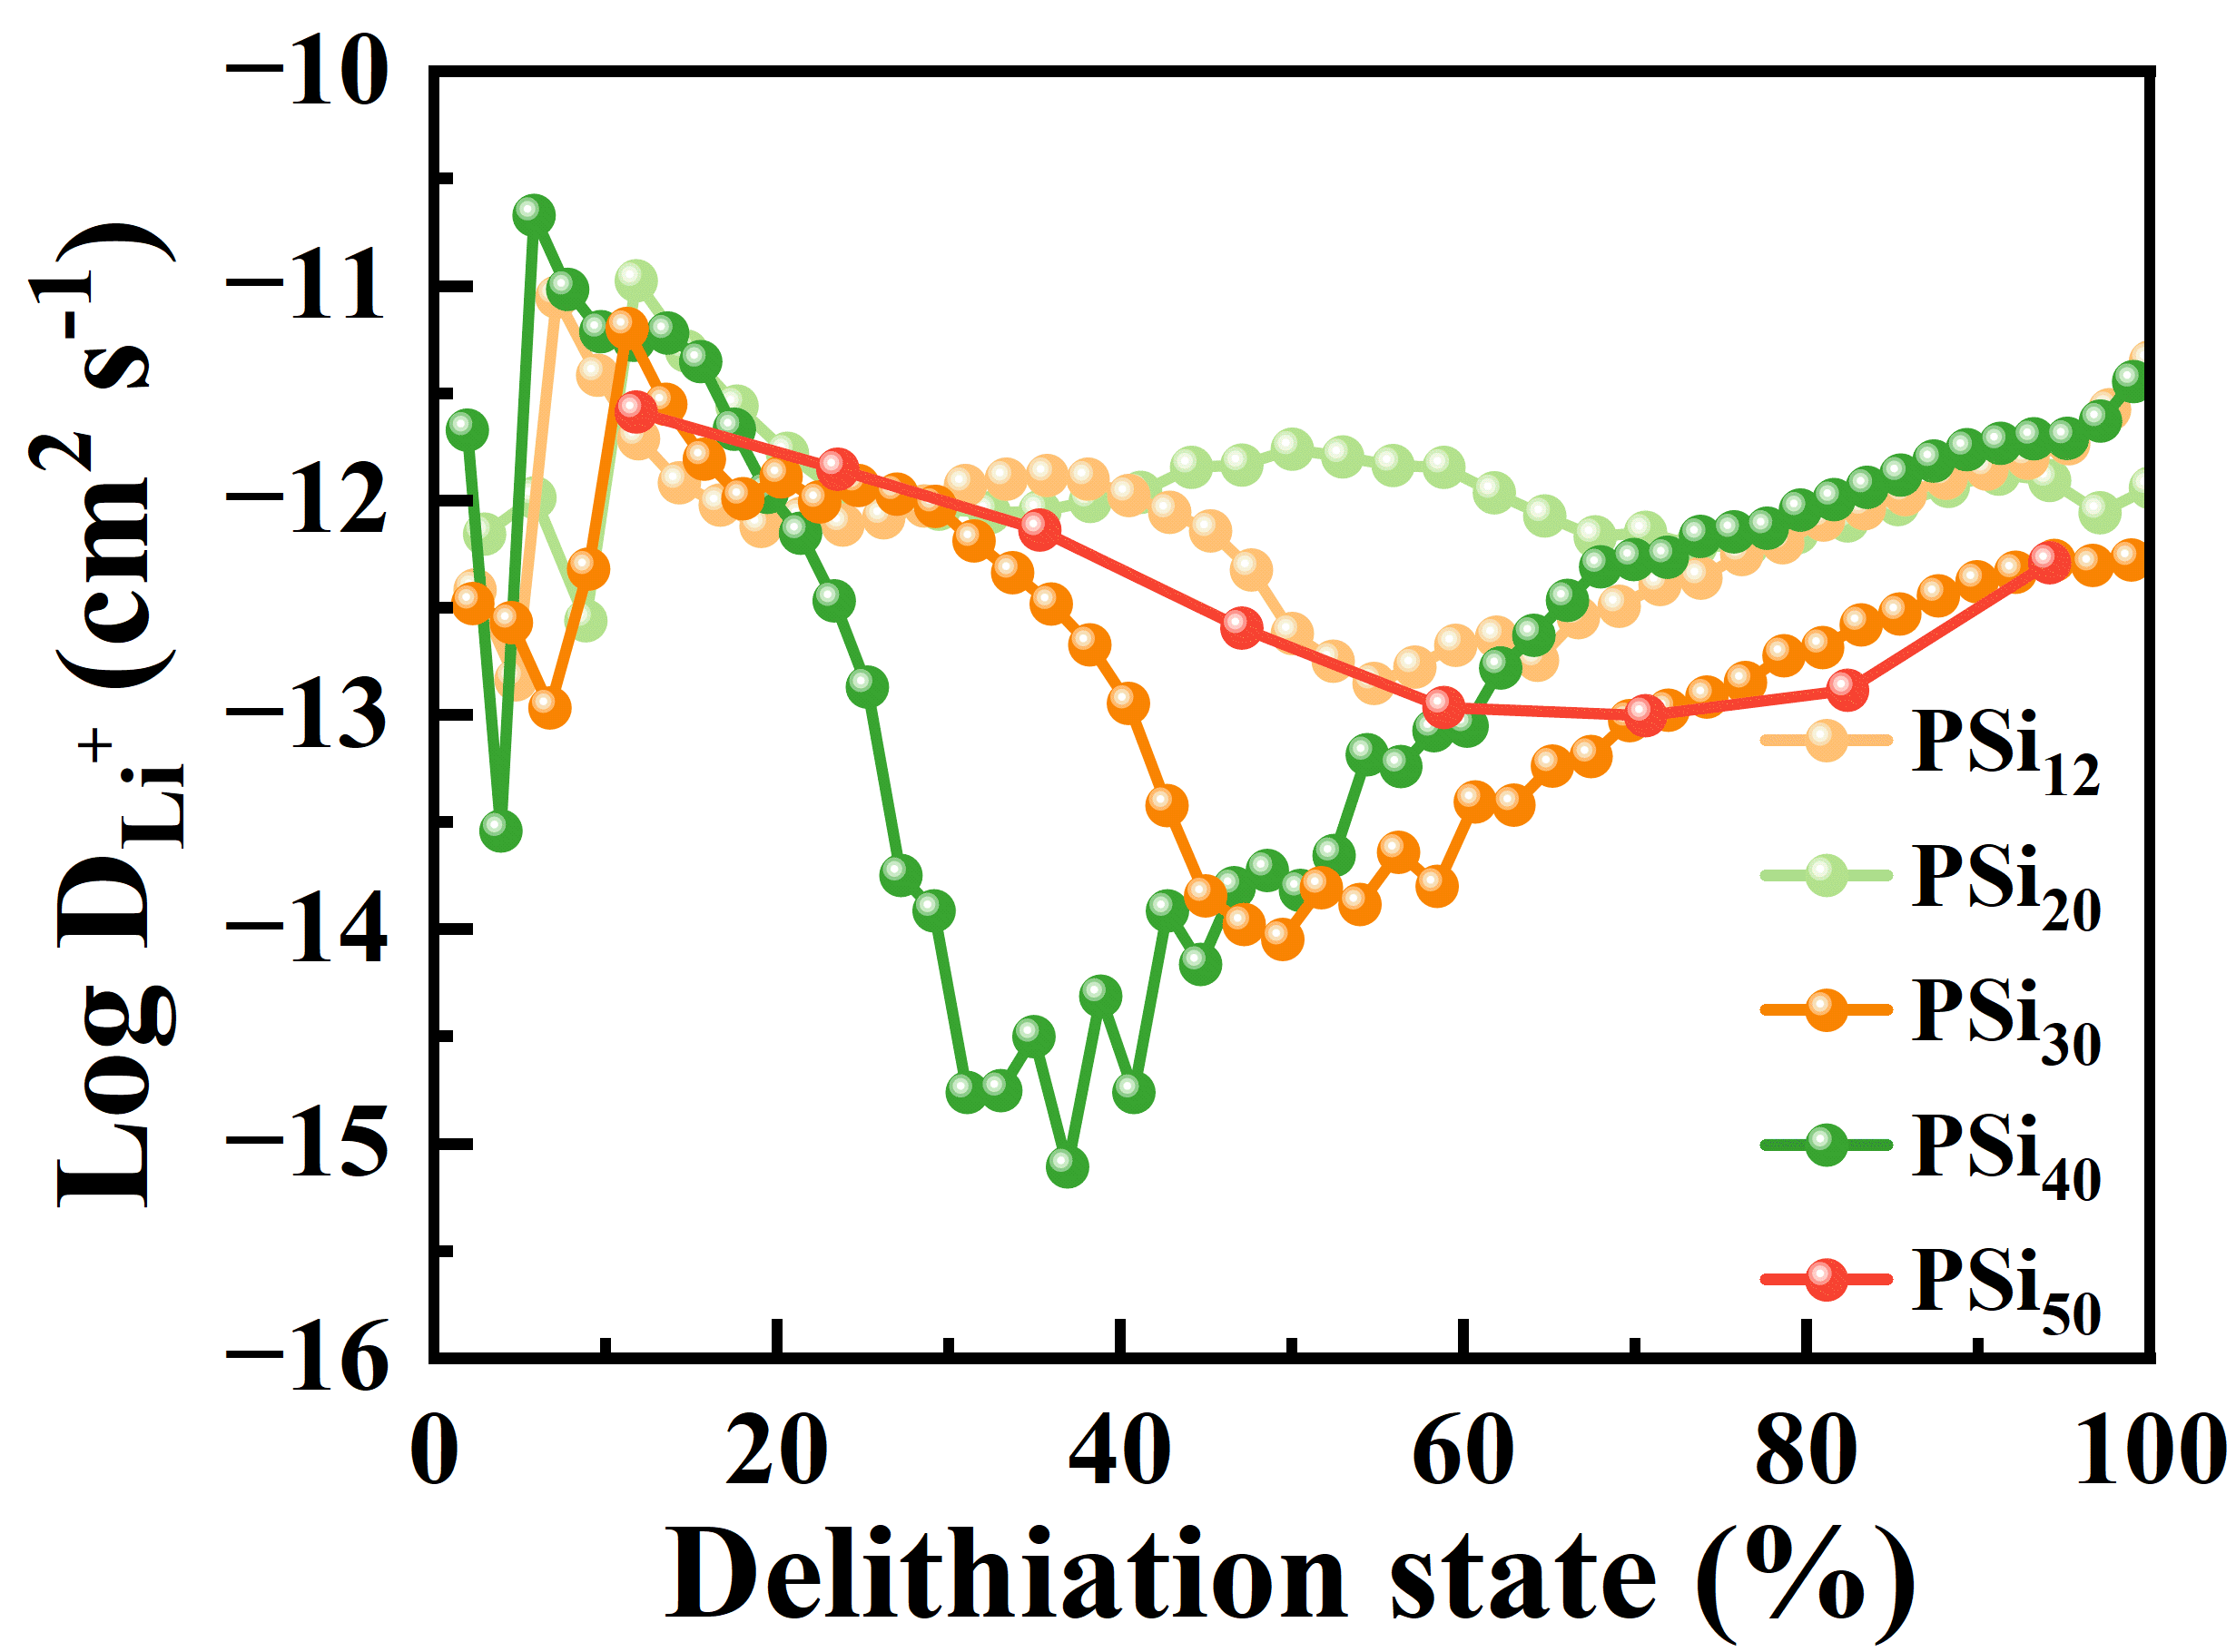


**Fig. S8** Diffusion coefficients at different states of delithiation.


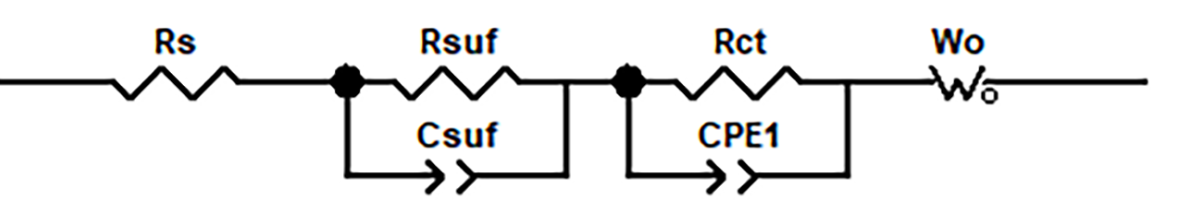


**Fig. S9** Equivalent circuits.


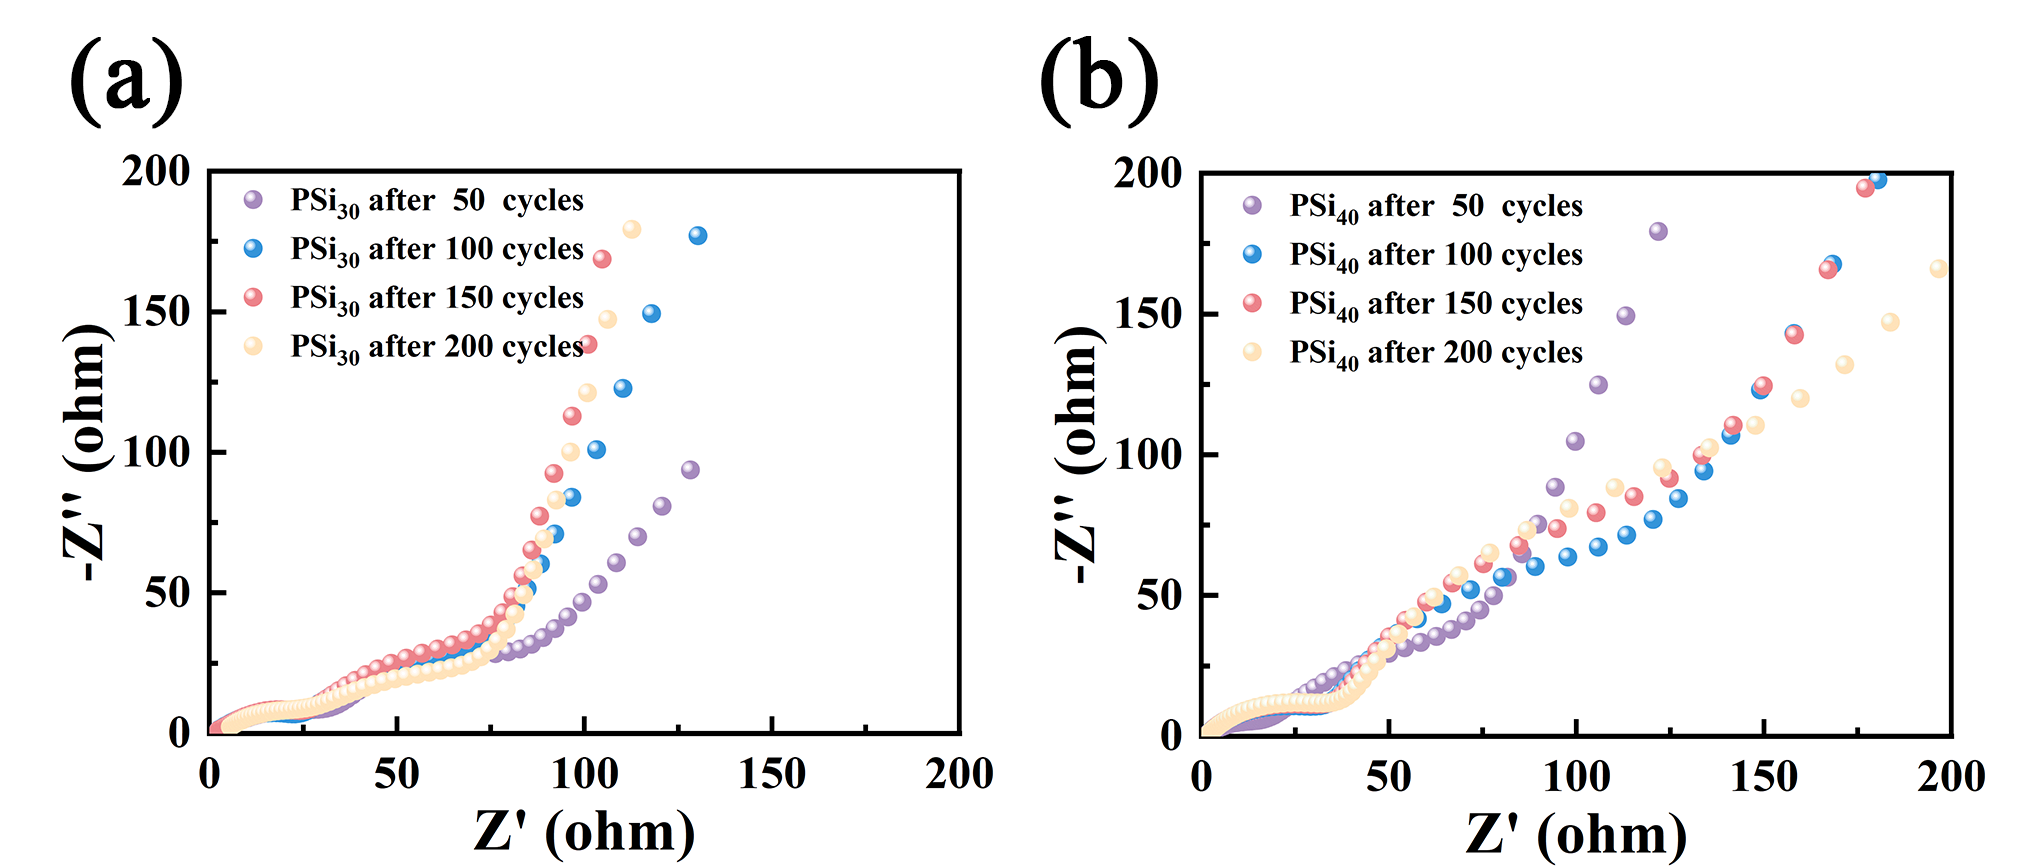


**Fig. S10** Nyquist plots of porous silicon electrodes at 0.5 A g−1 over 0.01-105 Hz for the 50th, 100th, 150th, and 200th cycles: (a) PSi30 and (b) PSi50.


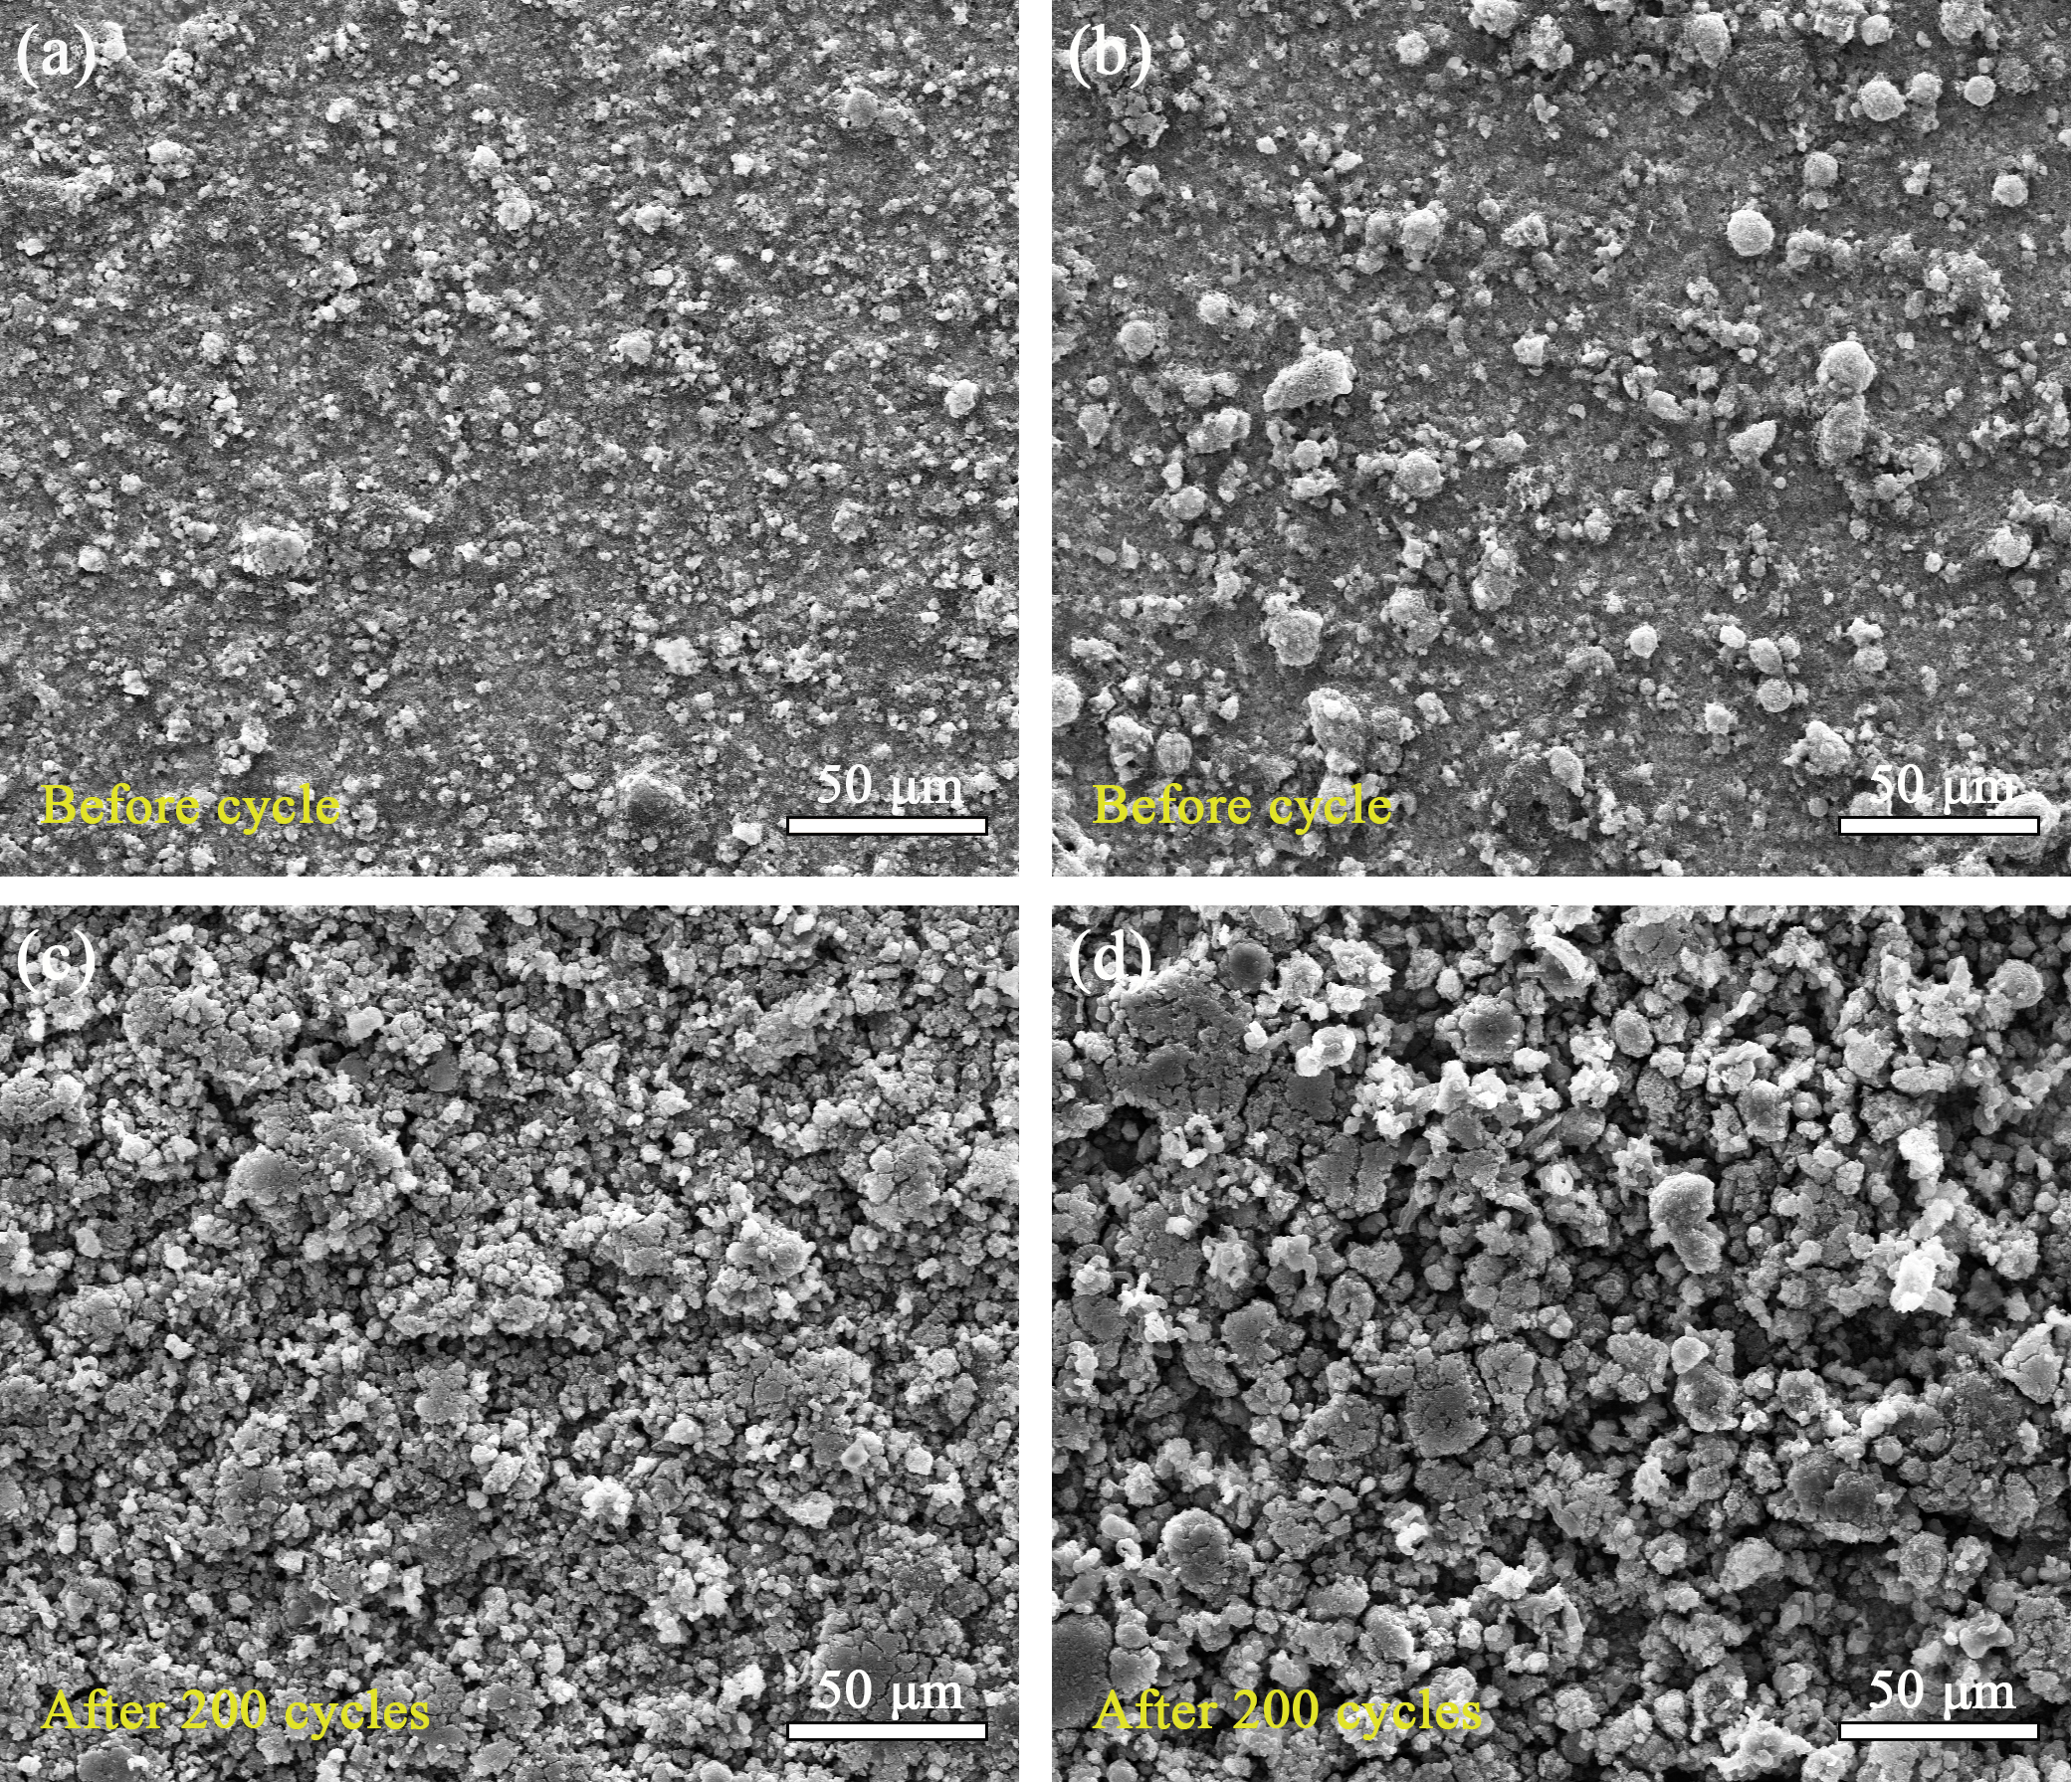


**Fig. S11** SEM images of PSi30 and PSi40 electrodes before cycling (a, b) and after 200 cycles at 0.5 A g-1 (c, d): PSi30 (a, c) and PSi40 (b, d).
